# Supplementary material for: RhoA-induced cytoskeletal tension controls adaptive cellular remodeling to mechanical signaling
Source: Royal Society of Chemistry journal article supplement (doi:10.1039/c2ib20008b), 2012-04-12
Supplement: c2ib20008b.pdf [file c2ib20008b.pdf]

### **Supplemental movie legends**

#### Movie 1.

Title: Simultaneous TIRF imaging and AFM mechanical stimulation on live single cell.

Legend: Time-lapse TIRF images of a VSMC expressing vinculin-GFP shows real-time FA rearrangement due to mechanical stimulation with a FN functionalized probe. Images were acquired during the AFM stimulation experiment at 12 time points. The movie is presented at 2 frames/sec. Image size is 91 x 91  $\mu\text{m}$ .

Keywords: focal adhesions, total internal reflection fluorescence microscopy, atomic force microscopy, mechanical stimulation

#### Movie 2.

Title: Simultaneous spinning-disk confocal imaging and AFM mechanical stimulation on live single cell.

Legend: Time-lapse spinning-disk confocal images of a VSMC expressing actin-mRFP shows real-time actin fibers rearrangement due to mechanical stimulation with a FN functionalized probe. Images were acquired during the AFM stimulation experiment at 10 time points. The movie is presented at 2 frames/sec. Image size is 91 x 91  $\mu\text{m}$ .

Keywords: actin, spinning-disk confocal microscopy, atomic force microscopy, mechanical stimulation
